# Supplementary material for: Self-branched Nb2O5 nanoarrays as “electron-ion reservoirs” to enhance the conversion of polysulfides in flexible Li–S batteries
Source: Royal Society of Chemistry journal article supplement (doi:10.1039/d1qi00735a), 2021-01-01
Supplement: d1qi00735a1.pdf [file d1qi00735a1.pdf]

# **Self-branched Nb<sub>2</sub>O<sub>5</sub> nanoarrays as the “electron-ion reservoirs” to enhance the conversion of polysulfides in flexible Li-S batteries**

Huanhuan Li,<sup>a,\*</sup> Huiqin Chen,<sup>a</sup> Yuxin Chen,<sup>a</sup> Guangyue Bai,<sup>a,\*</sup> Mengjie Zhang,<sup>a</sup> Shanshan Xie,<sup>b,\*</sup> and Kelei Zhuo<sup>a</sup>

<sup>a</sup>*Collaborative Innovation Center of Henan Province for Green Manufacturing of Fine Chemicals, Key Laboratory of Green Chemical Media and Reactions, Ministry of Education, School of Chemistry and Chemical Engineering, Henan Normal University, Xinxiang, Henan 453007, PR China.*

<sup>b</sup>*MR Department, the first affiliated hospital of Zhengzhou University, Henan, PR China.*

\*Corresponding author.

*E-mail address: lihuanhuan@htu.edu.cn; baiguangyue@htu.edu.cn; xiess89@163.com*

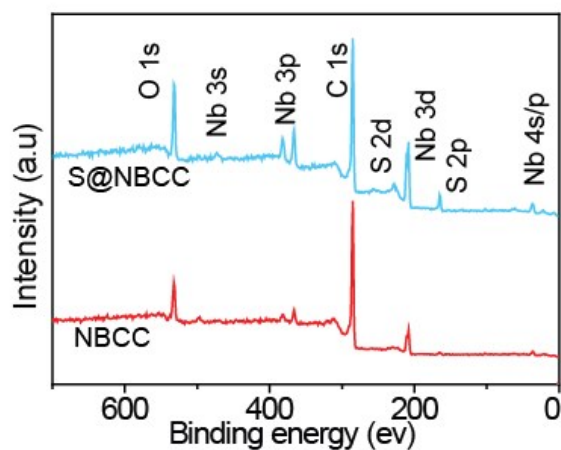

**Figure S1.** XPS analysis of the prepared NBCC and S@NBCC, respectively.

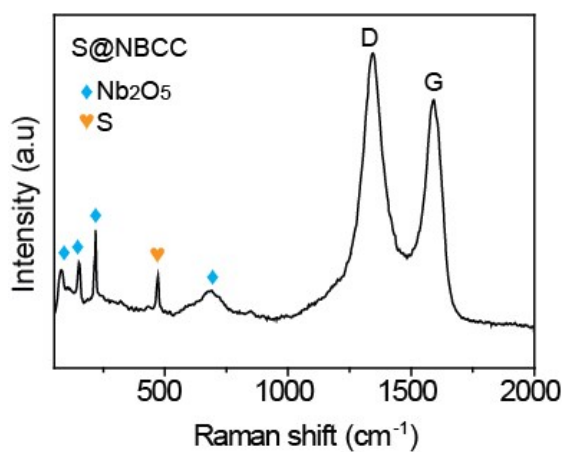

**Figure S2.** Raman spectrum of the prepared S@NBCC. As a typical class of CC matrix in the S@NBCC composite is verified by Raman spectroscopy with two bands around  $1580\text{ cm}^{-1}$  (graphitic carbon) and  $1360\text{ cm}^{-1}$  (disordered carbon).

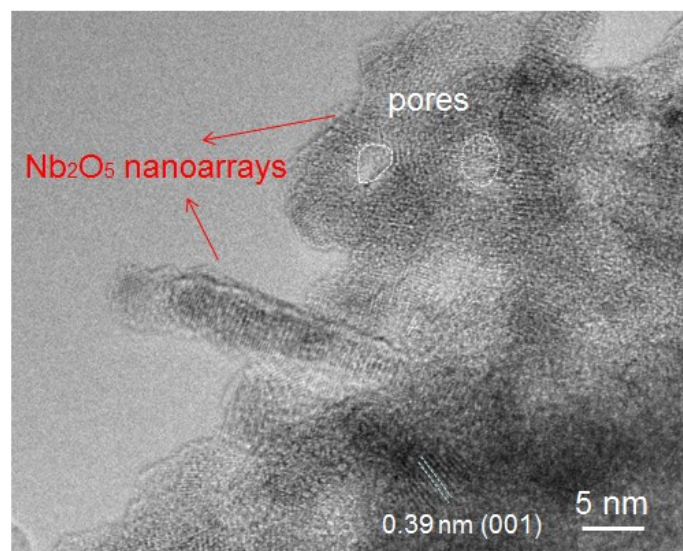

**Figure S3.** TEM image of NBCC.

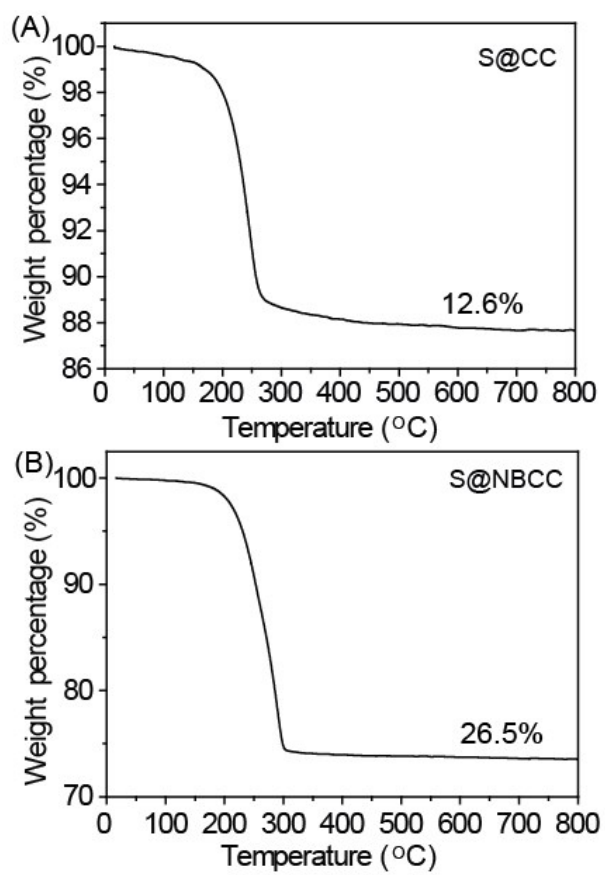

**Figure S4.** The TGA curves of (A) S@CC, (B) S@NBCC measured under a N<sub>2</sub> flow.

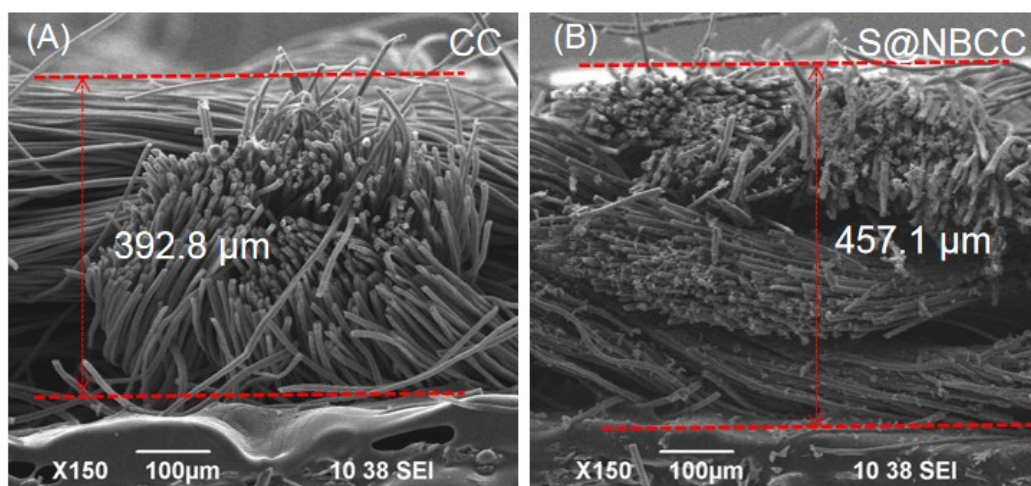

**Figure S5.** The cross-sectional SEM images of CC and S@NBCC, respectively.

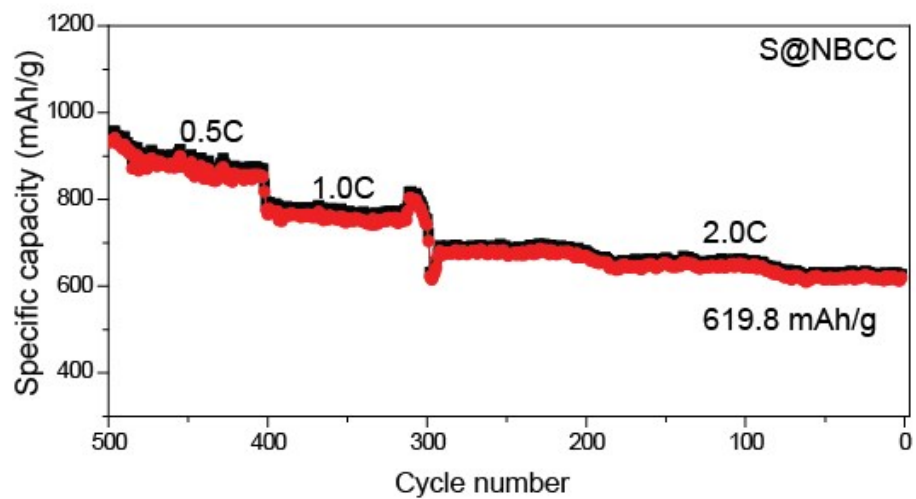

**Figure S6.** The long-term cycle performance of S@NBCC.
